# Supplementary material for: Inhibition of Neuroblastoma Tumor Growth by Ketogenic Diet and/or Calorie Restriction in a CD1-Nu Mouse Model
Source: PubMed Central journal article supplement (PMC4459995; doi:10.1371/journal.pone.0129802), 2015-06-08

S2 Figure Activities of mitochondrial OXPHOS complexes I-V of SK-N-BE(2) xenograft tumors.

## OXPHOS Activity SK-N-BE(2)

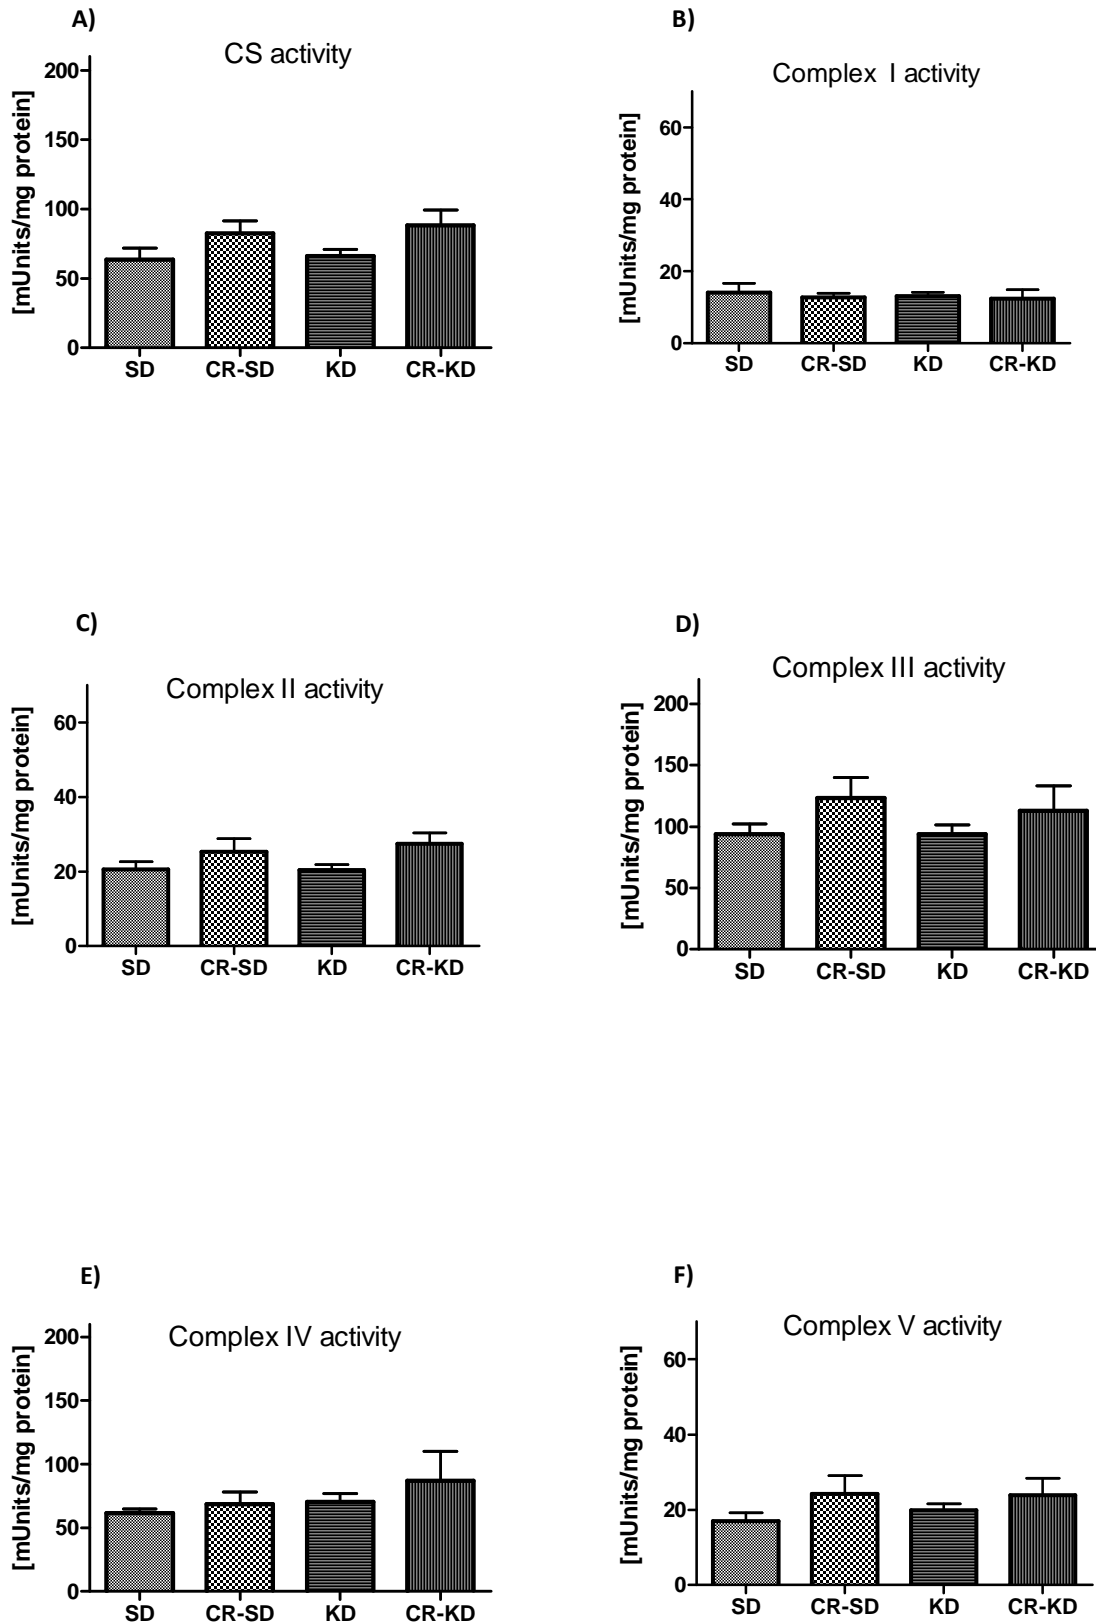

Supplement: pone.0129802.s002.pdf [file pone.0129802.s002.pdf]
