# Supplementary material for: Inhibition of Neuroblastoma Tumor Growth by Ketogenic Diet and/or Calorie Restriction in a CD1-Nu Mouse Model
Source: PubMed Central journal article supplement (PMC4459995; doi:10.1371/journal.pone.0129802), 2015-06-08
Supplement: pone.0129802.s006.pdf [file pone.0129802.s006.pdf]

**S2 Table** MtdNA copy number primer list.

|                         | <b>Gene (s)</b>       | <b>Forward primer</b>      | <b>Reverse primer</b>         |
|-------------------------|-----------------------|----------------------------|-------------------------------|
| mitochondrial fragments | MT-CO1                | CGG AGG AGG AGA CCC CAT TC | TGG TAG CGG AGG TGA AAT ATG C |
|                         | MT-CO3, MT-TG, MT-ND3 | AGC CGC CGC CTG ATA CTG    | GGG GAT ATA GGG TGG AAG CCG   |
| nuclear fragments       | POLG                  | TCC TGT GGT CAT TTA TGG CA | TAG ATC CTG CCC ACC CAA G     |
|                         | RRM2B                 | GCG ATA ATG CTG ATG TCC AG | CAT AAC CAA GCC GTA AGC AA    |
